# Supplementary material for: Dairy cows infected with influenza A(H5N1) reveals low infectious dose and transmission barriers
Source: Research Square preprint supplement (doi:10.21203/rs.3.rs-6900680/v1), 2025-06-19
Supplement: Supplementary file 1 [file a09fa666f5381f779e2d2019.docx]

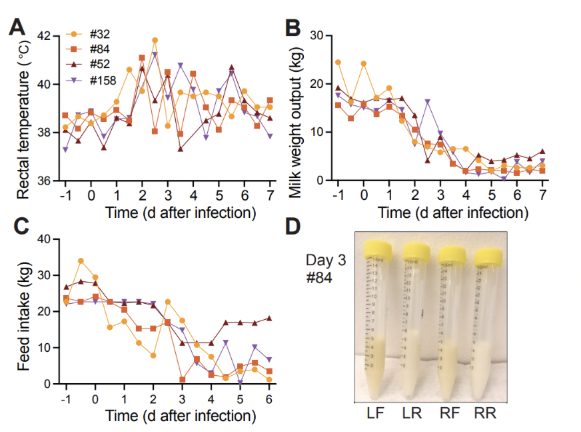


**Extended Data Fig 1. Influenza A(H5N1) efficiently infects the bovine mammary gland at low infectious doses.** (**A**) Rectal temperature, (**B**) milk weight output, and (**C**) feed intake were assessed every 12 hours for minimum infectious dose study (related to Figure 1). (**D**) Images of representative milk samples taken from the indicated teats (left front, LF; left rear, LR; right front, RF; right rear, RR) of cow #84 at day 3 post-inoculation. Note off-white to yellow color change in LF and RF milk samples at times coinciding with high viral titers.
